# Supplementary material for: Hydro-meteorological reconstruction and geomorphological impact assessment of the October, 2018 catastrophic flash flood at Sant Llorenç, Mallorca (Spain)
Source: Copernicus journal article supplement (doi:10.5194/nhess-2019-226), 2019-07-11
Supplement: Supplementary file [file nhess-2019-226-AC2-supplement.pdf]

**The paper presents a very good characterization of a very heavy rainfall event in Mallorca. Despite this is an isolated event, this a very good example on how analyzing this type of hazards from the meteorological origin, to the derived impacts of the flood. Such chain of analyses can serve as example to analyze a very common hazard affecting to many Mediterranean sites. The used methodology is robust and the authors provide evidence that it worked in a very reasonable way (despite the difficulty to get reliable observations for calibration and validation under such extreme conditions). The graphical material provided in the article is of great quality.**

We kindly appreciated the reviewer opinion on our manuscript. Following we describe how we addressed the main changes suggested by the reviewer. For a better tracking of the corrections, note that our answers are shown in normal font and reviewer comments are shown in bold.

**I have only minor comments in the structure of the article that authors may consider to prepare a definitive version of the manuscript. I think that the presentation of the synoptic characteristics of the storm should be moved to results section as they are presenting specific analyses for this event.**

In this particular case, we do not agree with the reviewer. In section 2.2 (Synoptic situation), we do not show any of our analysis or original results. Here we introduce a description of the synoptic situation which triggered the catastrophic flash flood, and we based this description on the information provided by secondary sources. Moreover, we think that the provided description acts as an introductory element for the upcoming hydro-meteorological reconstruction of the event, which is the core of the manuscript. For these reasons, we believe this information belongs to the Case Study section, rather than to the Results section.

**In addition, many other statements given when presenting results should probably be moved to discussion as they are not results themselves but they are hypothesis trying to explain the obtained results.**

We agree with the reviewer, and consequently we moved some paragraphs from the results to the discussion (please see the marked changes version of the manuscript).

**In addition, the authors might consider to present how the weather forecast from the main meteorological models evolved the days before to predict the precipitation over this area.**

The first paragraph of section 2.3 has been modified, providing further details on these issues (please see marked changes version).

**Authors said that models clearly underestimated the event, but it could be good to see more on that to illustrate to which extent the early warning systems (not real time ones) may work in these areas.**

The beginning of section 2.3 has been extended in order to provide further details on the severe underforecast of this event by the official operational models. In particular, we mention the systematic underestimations by all cycles of ECMWF and HARMONIE-AROME. As a graphical example, we show below the deterministic ECMWF forecast rainfall at 3-h intervals provided by the cycle starting at 9 October 00 UTC. We believe adding this kind of figures in the manuscript is unnecessary given the hydrologic-hydraulic main orientation of the study.

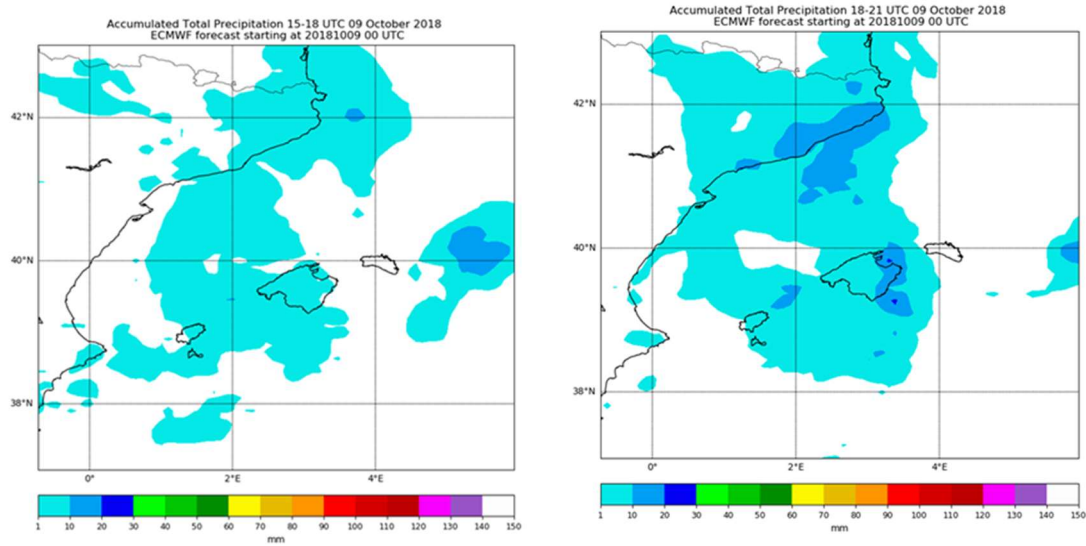

**There are small typos over the text, so may be good a last slow reading to correct them.**

We carefully read the manuscript and corrected several typos detected (see marked version of the manuscript).
